# Supplementary material for: The Serum Hepatitis B Virus Large Surface Protein as High-Risk Recurrence Biomarker for Hepatoma after Curative Surgery
Source: MDPI journal article supplement (doi:10.3390/ijms23105376), 2022-05-11
Supplement: s1 [file s1]

**Supplementary Table S1. Patient profiles of HCC patients (N=53)**

| variable                             |                    |
|--------------------------------------|--------------------|
| age (mean) (y)                       | 56.3               |
| sex (male/female)                    | 43/10              |
| cirrhosis (no/yes)                   | 19/34              |
| HBeAg (+/-)                          | 14/39              |
| AFP (mean) (ng/ml)                   | 12291.4            |
| viral load (mean) (IU/ml)            | $4.75 \times 10^6$ |
| differentiation (well/moderate/poor) | 8/34/11            |
| multifocal tumor (no/yes)            | 46/7               |
| satellite nodule (no/yes)            | 43/10              |
| tumor size (mean) (cm)               | 4.3                |
| vascular invasion (no/yes)           | 27/26              |
| AJCC stage (I/II/IIIA-IV)            | 29/14/10           |

Tumor differentiation according to WHO system; AFP, alpha-fetoprotein; AJCC, American Joint Committee on Cancer 2017.

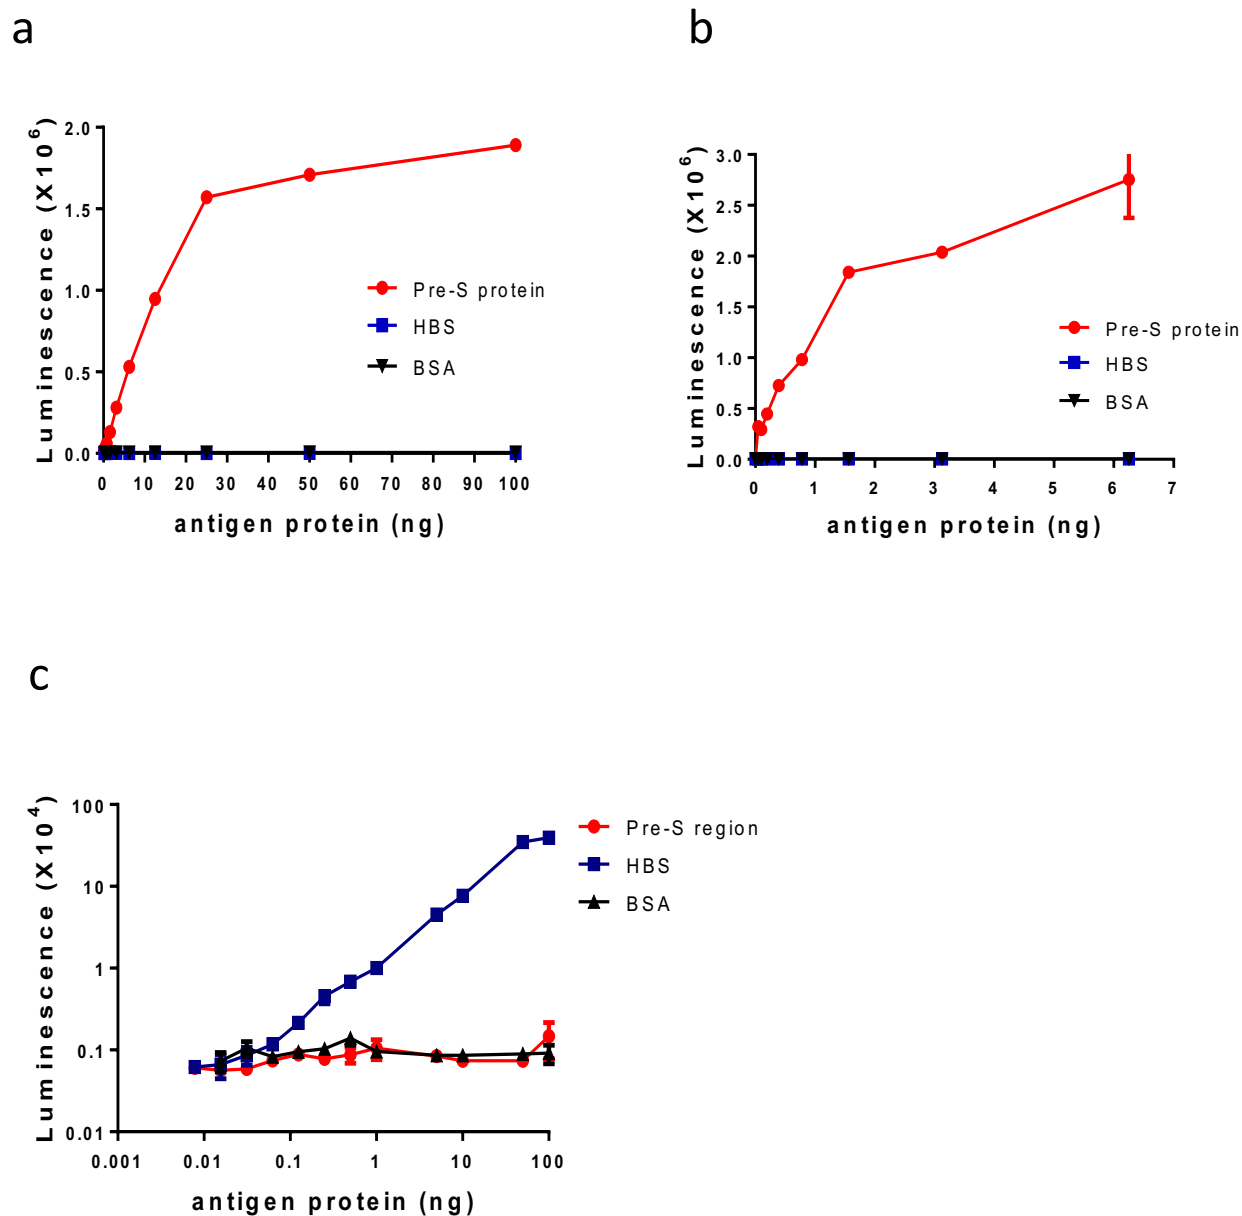

**Supplementary Figure S1.** Detection sensitivities and dynamic ranges of the monoclonal antibodies for the LHBS chemiluminescent ELISA system. **A-C** The LOD, LOQ, LOL, and detection dynamic ranges of the pre-S1 (**A**), pre-S2 (**B**) and HBS (**C**) antibodies to the respective recombinant antigen proteins were detected.
